# Supplementary material
Source: MDPI journal article supplement (https://www.mdpi.com/2073-4352/13/6/939)
Supplement: s1 [file s1]

**Table S1.** Bond Lengths (Å) for compound [La<sub>2</sub>(C<sub>6</sub>O<sub>4</sub>Cl<sub>2</sub>)<sub>3</sub>(fma)<sub>6</sub>] $\cdot$ 6fma (**1**).

| Atom | Atom             | Length (Å) | Atom | Atom             | Length (Å) |
|------|------------------|------------|------|------------------|------------|
| La1  | O1D              | 2.503(4)   | C16  | C12 <sup>2</sup> | 1.543(8)   |
| La1  | O11D             | 2.468(4)   | C16  | O16              | 1.267(7)   |
| La1  | O21D             | 2.508(4)   | C21  | Cl21             | 1.731(6)   |
| La1  | O2               | 2.557(4)   | C21  | C22              | 1.399(8)   |
| La1  | O6 <sup>1</sup>  | 2.614(4)   | C21  | C26              | 1.405(8)   |
| La1  | O12              | 2.548(4)   | C22  | C26 <sup>3</sup> | 1.526(8)   |
| La1  | O16 <sup>2</sup> | 2.552(4)   | C22  | O22              | 1.256(7)   |
| La1  | O22              | 2.526(4)   | C26  | C22 <sup>3</sup> | 1.526(8)   |
| La1  | O26 <sup>3</sup> | 2.544(4)   | C26  | O26              | 1.259(7)   |
| O1D  | C1D              | 1.250(8)   | O6   | La1 <sup>1</sup> | 2.614(4)   |
| O11D | C11D             | 1.246(7)   | O16  | La1 <sup>2</sup> | 2.552(4)   |
| O21D | C21D             | 1.247(8)   | O26  | La1 <sup>3</sup> | 2.544(4)   |
| C1   | Cl1              | 1.732(7)   | C1D  | N1D              | 1.320(8)   |
| C1   | C2               | 1.373(8)   | C11D | N11D             | 1.333(8)   |
| C1   | C6               | 1.399(8)   | C21D | N21D             | 1.328(8)   |
| C2   | C6 <sup>1</sup>  | 1.543(8)   | O100 | C100             | 1.241(8)   |
| C2   | O2               | 1.277(7)   | C100 | N100             | 1.324(9)   |
| C6   | C2 <sup>1</sup>  | 1.543(8)   | O200 | C200             | 1.373(9)   |
| C6   | O6               | 1.252(7)   | C200 | N200             | 1.216(9)   |
| C11  | Cl11             | 1.736(6)   | O300 | C300             | 1.245(11)  |
| C11  | C12              | 1.414(9)   | C300 | N300             | 1.151(15)  |
| C11  | C16              | 1.368(8)   | C300 | N301             | 1.064(16)  |
| C12  | C16 <sup>2</sup> | 1.543(8)   | N300 | N301             | 1.289(19)  |
| C12  | O12              | 1.250(7)   |      |                  |            |

1 = 1-x,1-y,2-z; 2 = -x,2-y,2-z; 3 = -x,2-y,1-z

**Table S2.** Bond Lengths (Å) for compound [La<sub>2</sub>(C<sub>6</sub>O<sub>4</sub>Br<sub>2</sub>)<sub>3</sub>(fma)<sub>6</sub>]·6fma (**2**).

| Atom | Atom            | Length (Å) | Atom | Atom             | Length (Å) |
|------|-----------------|------------|------|------------------|------------|
| La1  | O1D             | 2.520(4)   | C3   | C1 <sup>1</sup>  | 1.404(9)   |
| La1  | O11D            | 2.508(5)   | C11  | Br11             | 1.900(6)   |
| La1  | O21D            | 2.483(4)   | C11  | C12              | 1.379(10)  |
| La1  | O2              | 2.622(5)   | C11  | C13 <sup>2</sup> | 1.406(10)  |
| La1  | O3              | 2.566(4)   | C12  | C13              | 1.547(9)   |
| La1  | O12             | 2.556(5)   | C13  | C11 <sup>2</sup> | 1.406(10)  |
| La1  | O13             | 2.557(5)   | C21  | Br21             | 1.887(7)   |
| La1  | O22             | 2.544(4)   | C21  | C22              | 1.391(9)   |
| La1  | O23             | 2.539(4)   | C21  | C23 <sup>3</sup> | 1.386(8)   |
| O1D  | C1D             | 1.252(8)   | C22  | C23              | 1.551(9)   |
| O11D | C11D            | 1.231(9)   | C23  | C21 <sup>3</sup> | 1.386(8)   |
| O21D | C21D            | 1.239(7)   | C1D  | N1D              | 1.310(8)   |
| O2   | C2              | 1.239(7)   | C11D | N11D             | 1.319(9)   |
| O3   | C3              | 1.261(8)   | C21D | N21D             | 1.318(9)   |
| O12  | C12             | 1.270(8)   | O100 | O10'             | 1.220(19)  |
| O13  | C13             | 1.236(8)   | O100 | C100             | 1.265(16)  |
| O22  | C22             | 1.261(7)   | O10' | C100             | 1.02(2)    |
| O23  | C23             | 1.250(7)   | C100 | N100             | 1.159(14)  |
| C1   | Br1             | 1.873(8)   | O101 | C101             | 1.247(9)   |
| C1   | C2              | 1.425(9)   | C101 | N101             | 1.323(11)  |
| C1   | C3 <sup>1</sup> | 1.404(9)   | O102 | C102             | 1.231(9)   |
| C2   | C3              | 1.530(10)  | C102 | N102             | 1.335(9)   |

1 = 1-x,1-y,1-z; 2 = 2-x,-y,1-z; 3 = 2-x,-y,2-z

**Table S3.** Bond Lengths for compound [Eu<sub>2</sub>(C<sub>6</sub>O<sub>4</sub>Cl<sub>2</sub>)<sub>3</sub>(fma)<sub>6</sub>].6fma (**3**).

| Atom | Atom             | Length/Å | Atom | Atom             | Length/Å  |
|------|------------------|----------|------|------------------|-----------|
| Eu1  | O1D              | 2.377(3) | O100 | C100             | 1.231(7)  |
| Eu1  | O2               | 2.454(3) | O101 | C101             | 1.234(6)  |
| Eu1  | O6 <sup>1</sup>  | 2.465(3) | O102 | C102             | 1.239(5)  |
| Eu1  | O11D             | 2.418(3) | N001 | N100             | 1.308(12) |
| Eu1  | O12              | 2.455(3) | N001 | C100             | 1.037(11) |
| Eu1  | O16 <sup>2</sup> | 2.548(3) | N1D  | C1D              | 1.303(5)  |
| Eu1  | O21D             | 2.400(3) | N11D | C11D             | 1.300(5)  |
| Eu1  | O22              | 2.444(3) | N21D | C21D             | 1.296(5)  |
| Eu1  | O26 <sup>3</sup> | 2.459(3) | N100 | C100             | 1.189(8)  |
| Cl1  | C1               | 1.728(4) | N101 | C101             | 1.316(6)  |
| Cl11 | C11              | 1.733(4) | N102 | C102             | 1.288(6)  |
| Cl21 | C21              | 1.727(4) | C1   | C2               | 1.384(6)  |
| O1D  | C1D              | 1.236(5) | C1   | C6               | 1.413(5)  |
| O2   | C2               | 1.263(5) | C2   | C6 <sup>1</sup>  | 1.527(6)  |
| O6   | C6               | 1.246(5) | C11  | C12              | 1.376(6)  |
| O11D | C11D             | 1.244(5) | C11  | C16              | 1.411(6)  |
| O12  | C12              | 1.272(5) | C12  | C16 <sup>2</sup> | 1.527(6)  |
| O16  | C16              | 1.244(5) | C21  | C22              | 1.393(5)  |
| O21D | C21D             | 1.240(5) | C21  | C26              | 1.396(5)  |
| O22  | C22              | 1.257(5) | C22  | C26 <sup>3</sup> | 1.532(6)  |
| O26  | C26              | 1.255(5) |      |                  |           |

1 = -x,2-y,2-z; 2 = 1-x,1-y,2-z; 3 = -x,2-y,1-z

**Table S4.** Bond Lengths for compound [Eu<sub>2</sub>(C<sub>6</sub>O<sub>4</sub>Br<sub>2</sub>)<sub>3</sub>(fma)<sub>6</sub>].6fma (**4**).

| Atom | Atom             | Length/Å | Atom | Atom             | Length/Å  |
|------|------------------|----------|------|------------------|-----------|
| Eu01 | O11D             | 2.413(5) | O21D | C21D             | 1.237(9)  |
| Eu01 | O22              | 2.477(5) | N100 | C100             | 1.198(12) |
| Eu01 | O6 <sup>1</sup>  | 2.453(5) | N21D | C21D             | 1.323(9)  |
| Eu01 | O1D              | 2.382(5) | O102 | C102             | 1.241(10) |
| Eu01 | O2               | 2.453(5) | N11D | C11D             | 1.304(10) |
| Eu01 | O26 <sup>2</sup> | 2.483(5) | O101 | C101             | 1.233(8)  |
| Eu01 | O12              | 2.465(5) | N1D  | C1D              | 1.284(7)  |
| Eu01 | O16 <sup>3</sup> | 2.548(5) | C2   | C6 <sup>1</sup>  | 1.544(9)  |
| Eu01 | O21D             | 2.429(5) | C2   | C1               | 1.390(11) |
| Eu01 | C6 <sup>1</sup>  | 3.269(8) | C22  | C26 <sup>2</sup> | 1.545(9)  |
| Br21 | C21              | 1.889(7) | C22  | C21              | 1.379(11) |
| Br11 | C11              | 1.880(8) | C6   | C1               | 1.387(11) |
| Br1  | C1               | 1.887(7) | C26  | C21              | 1.408(10) |
| O11D | C11D             | 1.251(9) | O100 | C100             | 1.369(12) |
| O22  | C22              | 1.269(9) | N102 | C102             | 1.291(10) |
| O6   | C6               | 1.251(9) | C11  | C12              | 1.401(11) |
| O1D  | C1D              | 1.242(8) | C11  | C16              | 1.416(10) |
| O2   | C2               | 1.278(9) | C12  | C16 <sup>3</sup> | 1.529(11) |
| O26  | C26              | 1.234(9) | C101 | N101             | 1.231(14) |
| O12  | C12              | 1.269(9) | C101 | N110             | 1.01(2)   |
| O16  | C16              | 1.233(9) | N101 | N110             | 1.18(2)   |

1 = -x,2-y,-z; 2 = -x,2-y,1-z; 3 = 1-x,1-y,1-z

**Table S5.** Selected vibrational frequencies (cm<sup>-1</sup>) for compounds **1-4**.

| M        | $\nu(\text{N-H})\text{s}$ | $\nu(\text{C=O})$<br>$\nu(\text{C=O})\text{s}$<br>$\nu(\text{C-N})\text{s}$ | $\nu(\text{C=C})$<br>$\nu(\text{C-O})$ | $\nu(\text{C-C})$<br>$\nu(\text{C-O})$ | $\nu(\text{C-X})$<br>$\delta(\text{C=O})$<br>$\delta(\text{C-O})$ | $\rho(\text{C-X})$ |
|----------|---------------------------|-----------------------------------------------------------------------------|----------------------------------------|----------------------------------------|-------------------------------------------------------------------|--------------------|
| <b>1</b> | 3144                      | 1687                                                                        | 1505                                   | 1325                                   | 840                                                               | 569                |
| <b>2</b> | 3421                      | 1684                                                                        | 1508                                   | 1384                                   | 849                                                               | 578                |
| <b>3</b> | 3423                      | 1679                                                                        | 1547                                   | 1385                                   | 837                                                               | 561                |
| <b>4</b> | 3415                      | 1684                                                                        | 1506                                   | 1383                                   | 849                                                               | 577                |

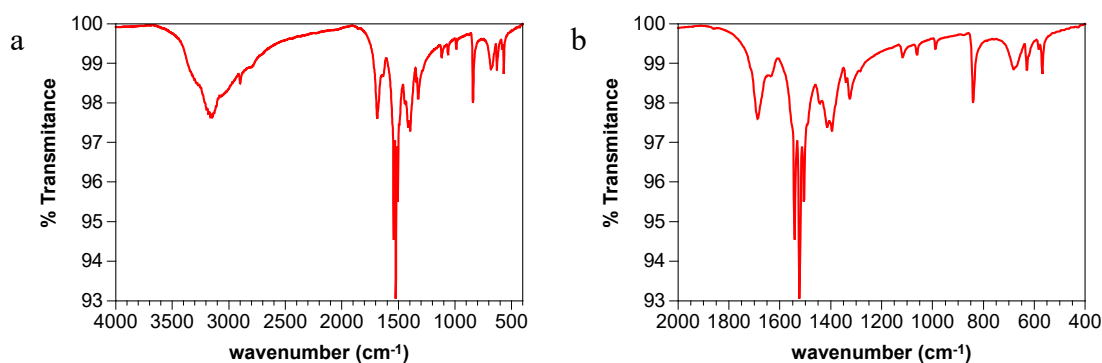**Figure S1.** FT-IR spectra of **1** in the **a)** 4000-400 cm<sup>-1</sup> region and **b)** 2000-400 cm<sup>-1</sup> region.

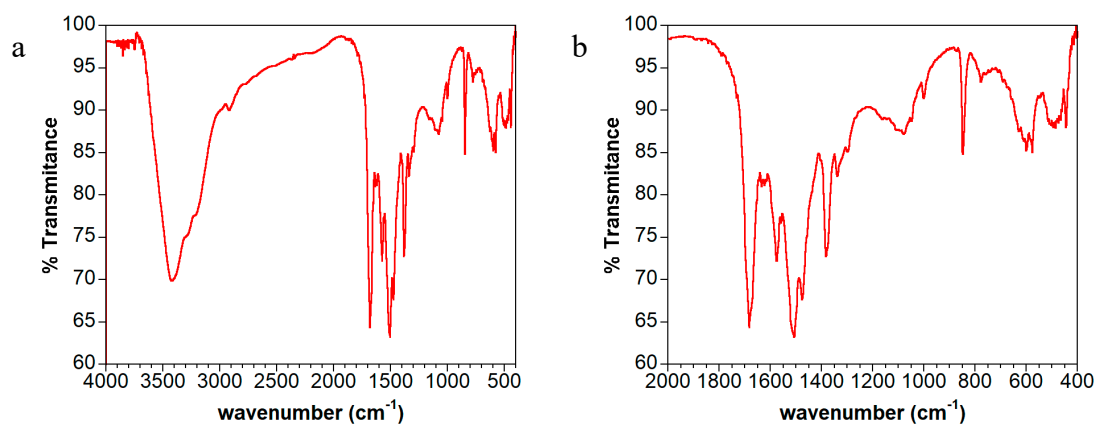

**Figure S2.** FT-IR spectra of **2** in the **a)** 4000-400  $\text{cm}^{-1}$  region and **b)** 2000-400  $\text{cm}^{-1}$  region.

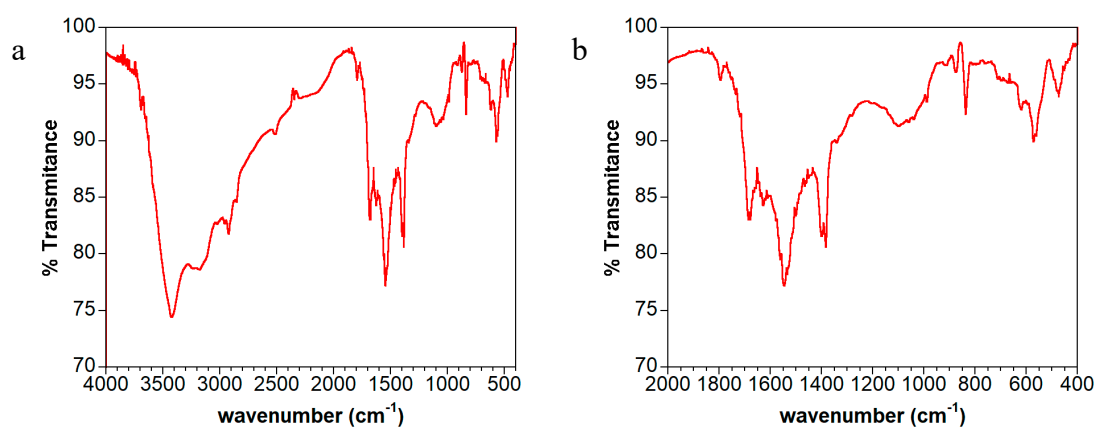

**Figure S3.** FT-IR spectra of **3** in the **a)** 4000-400  $\text{cm}^{-1}$  region and **b)** 2000-400  $\text{cm}^{-1}$  region.

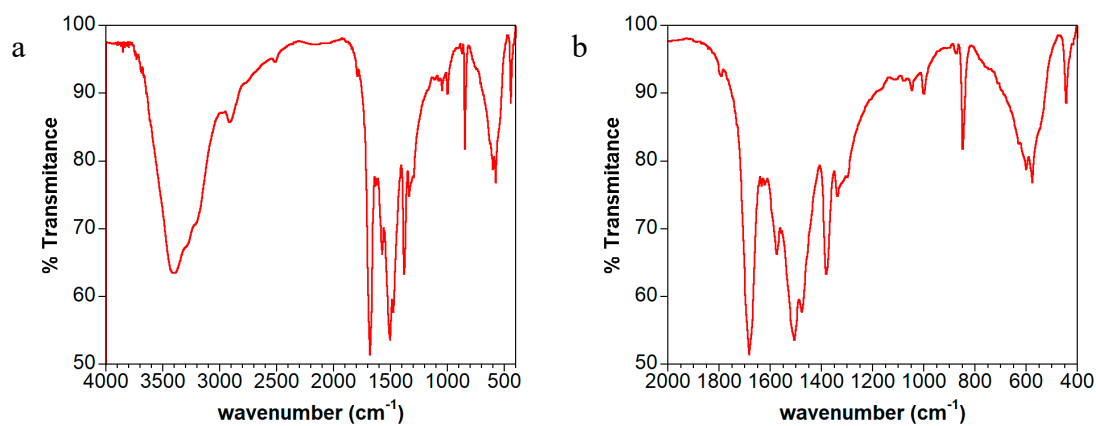

**Figure S4.** FT-IR spectra of **4** in the **a)** 4000-400  $\text{cm}^{-1}$  region and **b)** 2000-400  $\text{cm}^{-1}$  region.
